# Supplementary material for: Exfoliated black phosphorous-mediated CuAAC chemistry for organic and macromolecular synthesis under white LED and near-IR irradiation
Source: publisher site journal article supplement (doi:10.3762/bjoc.17.164), 2021-09-23
Supplement: Additional file 1 [file 1860-5397-17-164-S1.pdf]

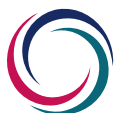

## Supporting Information

for

### **Exfoliated black phosphorous-mediated CuAAC chemistry for organic and macromolecular synthesis under white LED and near-IR irradiation**

Azra Kocaarslan, Zafer Eroglu, Önder Metin and Yusuf Yagci

*Beilstein J. Org. Chem.* **2021**, *17*, 2477–2487. [doi:10.3762/bjoc.17.164](https://doi.org/10.3762/bjoc.17.164)

### **Characterisation data: $^1\text{H}$ NMR spectra of Alk-1, Alk-2 and Alk-3, TEM, HAADF-STEM and associated EDS elemental mapping of PS-*b*-PCL**

## CONTENTS

**Figure S1.**  $^1\text{H}$  NMR spectra of the reaction between benzyl azide and propargyl acrylate after exposure using BPNs under NIR light irradiation.

**Figure S2.**  $^1\text{H}$  NMR spectra of the reaction between benzyl azide and propargyl amine after exposure using exfoliated BP under NIR light irradiation.

**Figure S3.**  $^1\text{H}$  NMR spectra of the reaction between benzyl azide and propargyl alcohol after exposure using exfoliated BP under NIR light irradiation.

**Figure S4.** Kinetic study of CuAAC reaction between propargyl alcohol and benzyl azide under NIR light.

**Figure S5.** TEM images of **a** and **b** PS-*b*-PCL block copolymer at different magnification.

**Figure S6.** HAADF-STEM image **a** associated EDS elemental mapping images **b** of PS-*b*-PCL block copolymer.

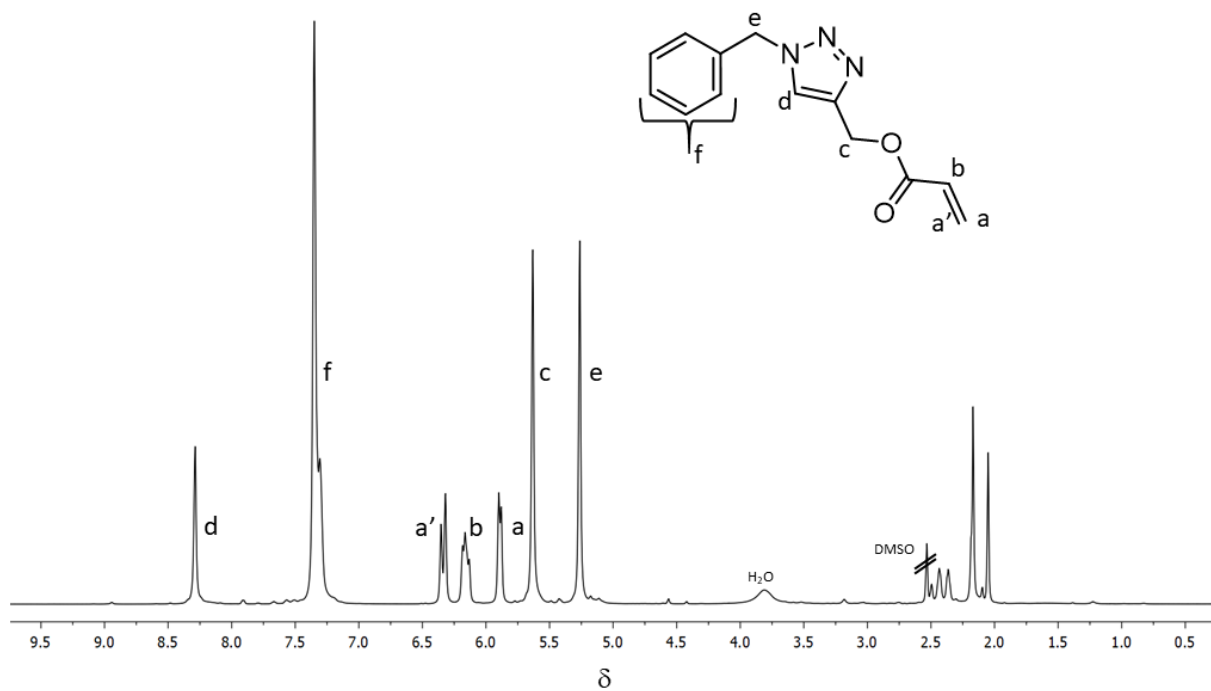

**Figure S1.** <sup>1</sup>H NMR spectra of the reaction between benzyl azide and propargyl acrylate after exposure using BPNs under NIR light irradiation.

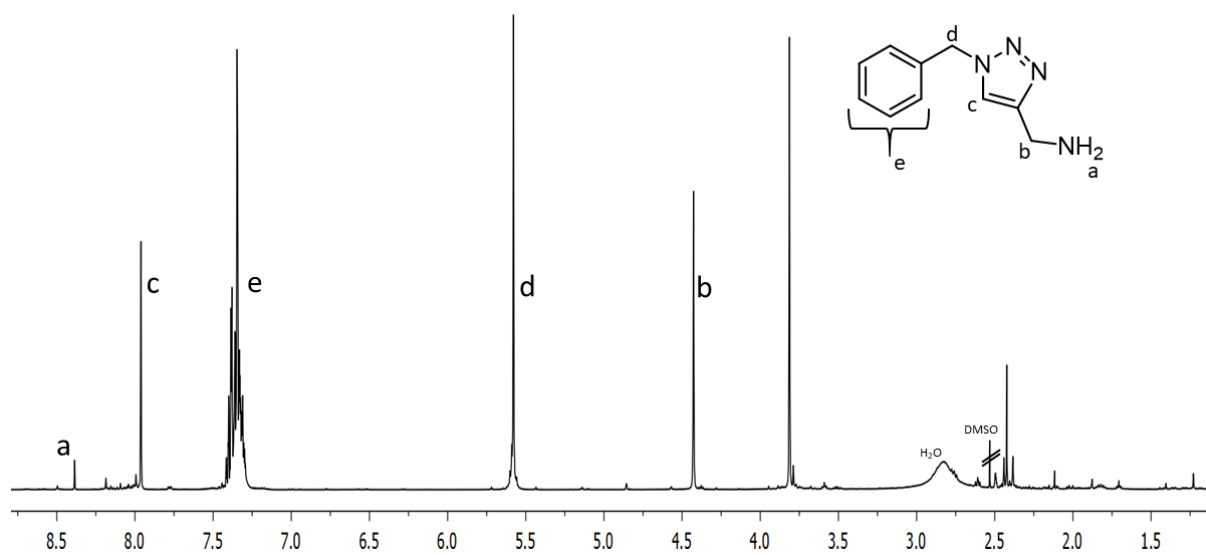

**Figure S2.** <sup>1</sup>H NMR spectra of the reaction between benzyl azide and propargyl amine after exposure using exfoliated BP under NIR light irradiation.

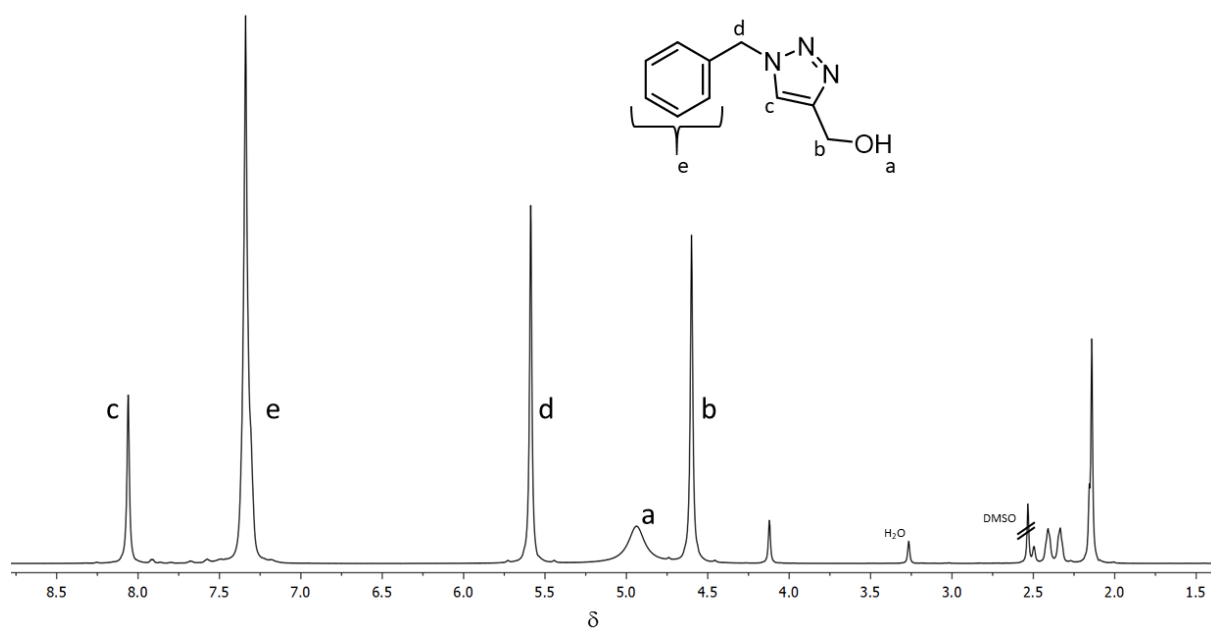

**Figure S3.**  $^1\text{H}$  NMR spectra of the reaction between benzyl azide and propargyl alcohol after exposure using exfoliated BP under NIR light irradiation.

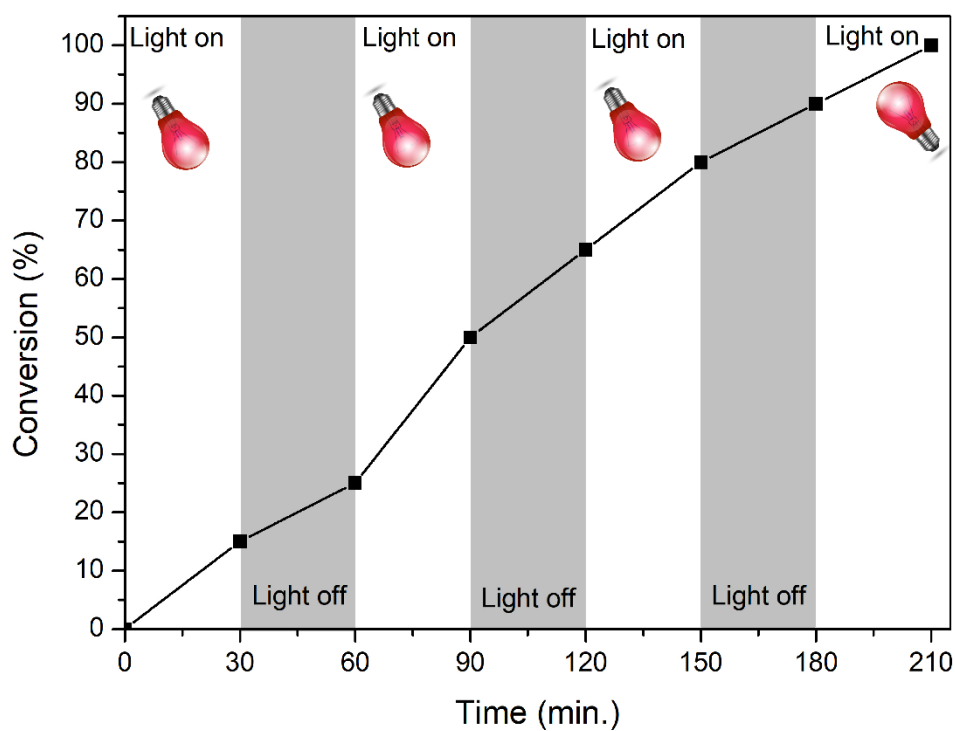

**Figure S4.** Kinetic study of CuAAC reaction between propargyl alcohol and benzyl azide under NIR light.

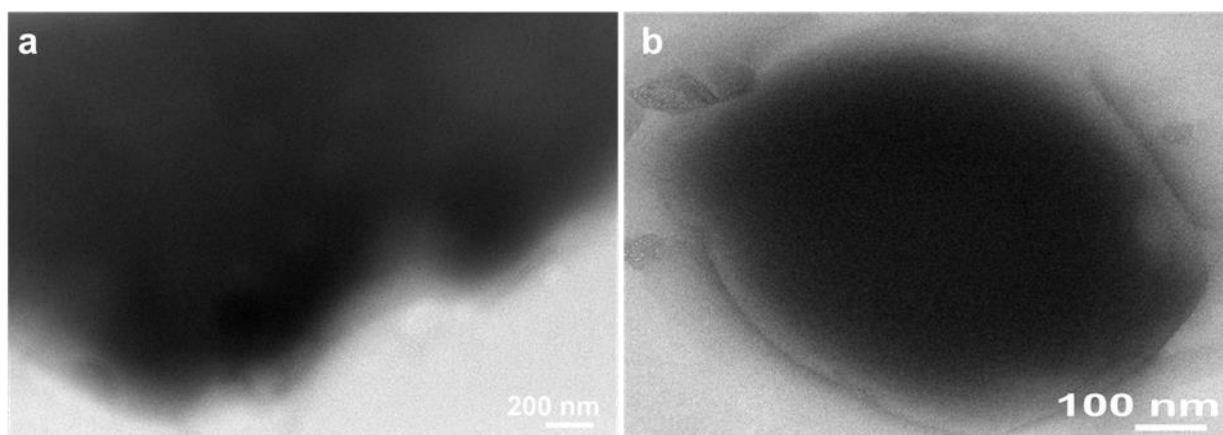

**Figure S5.** TEM images of **a** and **b** PS-*b*-PCL block copolymer at different magnification.

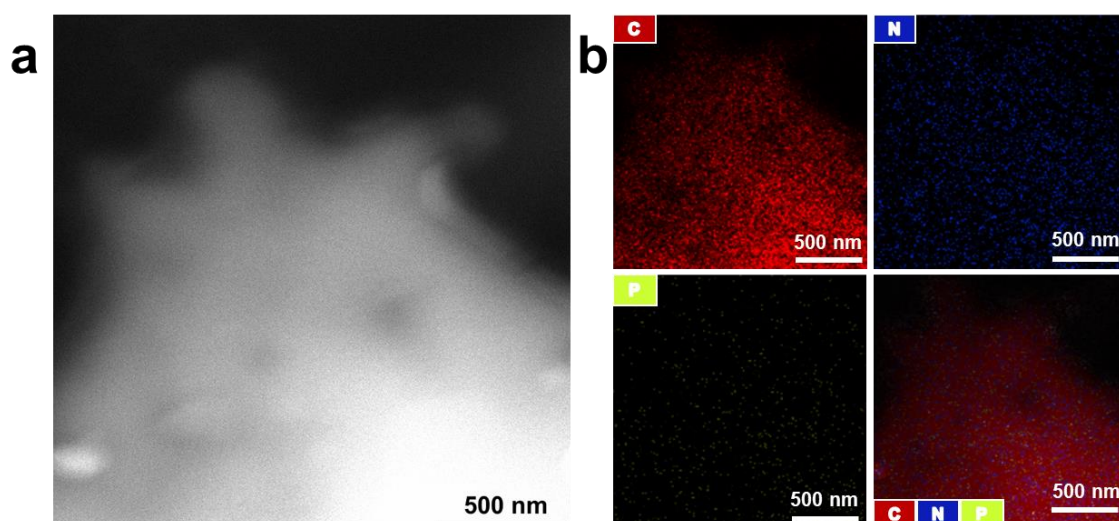

**Figure S6.** HAADF-STEM image **a** associated EDS elemental mapping images **b** of PS-*b*-PCL block copolymer.
